# Supplementary material for: High-level production of NMN in Escherichia coli through co-utilization of glucose and glycerol
Source: Research Square preprint supplement (doi:10.21203/rs.3.rs-8629898/v1), 2026-02-02
Supplement: Supplementary file 1 [file c03fd09085587a2c6cb68589.docx]

**High-level production of NMN in *Escherichia coli* through co-utilization of glucose and glycerol**

Jiajia Gan1,2, Yongzhi He1, Yanfeng Zhang3, Jin Zhong1,2,*, Zhiyang Dong1,*, Xiuzhen Chen1,*

1 *State Key Laboratory of Microbial Diversity and Innovative Utilization, Institute of Microbiology, Chinese Academy of Sciences, Beijing, 100101, China*

2*School of Life Science, University of Chinese Academy of Sciences, Beijing, 100049, China*

3 *ShenZhen Siyomicro Bio-Tech Co., Ltd, Shenzhen, 518100, China*

***Corresponding author**

Xiuzhen Chen: chenxiuzhen@im.ac.cn

Zhiyang Dong: dongzy@im.ac.cn

Jin Zhong: zhongj@im.ac.cn

## **Table S1.** Primers used for gene editing.

| Name | Sequences (5’-3’) |
| --- | --- |
| gRNA-pgi-F | taccagctgatccaccagttttagagctagaaatagca |
| gRNA-pgi-R | tggtggatcagctggtagaaactagtattatacctaggact |
| gRNA-pykA-F | cgttcagttcgacaatggttttagagctagaaatagca |
| gRNA-pykA-R | cattgtcgaactgaacgtccactagtattatacctaggact |
| gRNA-pykF-F | ccgactcgcgcagaagcgttttagagctagaaatagca |
| gRNA-pykF-R | gcttctgcgcgagtcgggcgactagtattatacctaggact |
| gRNA-glpK-F | gtgaactatgcgttggagttttagagctagaaatagca |
| gRNA-glpK-R | tccaacgcatagttcacttcactagtattatacctaggact |
| pgi-up-F | catcagaaagcacaatatcagcgc |
| pgi-up-R | tagcaatactcttctgattttgagaattgtga |
| pgi-down-F | aaatcagaagagtattgctatcatcgtcgatatgtaggccg |
| pgi-down-R | cgcaagcgcagatatggcaaa |
| pykA-up-F | cccacgatgcgatgaataagttctt |
| pykA-up-R | gtaatactccgttgactgaaacaaccag |
| pykA-down-F | ttcagtcaacggagtattacgtacgttgccggatgcgg |
| pykA-down-R | gattatgtctggaacacggtgcg |
| pykF-up-F | ataacaatatgctttggttcctgcc |
| pykF-up-R | attaattcacaaaagcaatagacagtcttagtctttaagttgagaaggatg |
| pykF-down-F | tattgcttttgtgaattaatttgtatatcgaagcg |
| pykF-down-R | cagtagagtcagcgcagaatg |
| glpk-up-F | atcgtttcacaagttgccggc |
| glpk*-up-R | accgcactttccaacgcatagttcacttcg |
| glpk*-down-F | atgcgttggaaagtgcggtg |
| glpk-down-R | ggcaaaccgttgagcgaactg |
| pgi-JD-F | ccaggttccagtccttcagct |
| pgi-JD-R | gtattagaaccatcaccgccaccg |
| pykA-JD-F | cattcactggataaatctgccatcaacc |
| pykA-JD-R | ccgtcgatattcctgccatgctg |
| pykF-JD-F | ctgcgctgaatgcgtttattgg |
| pykF-JD-R | cgataaagcgttgtatcgtcggg |
| glpk-JD-F | ctttctgtgctgcggctttagtt |
| glpk-JD-R | aattctcacctgtatgccagacagc |
| sp-JD-F | accgcctttgagtgagct |
| sp-JD-R | atcagaggtagttggcgtcatcg |


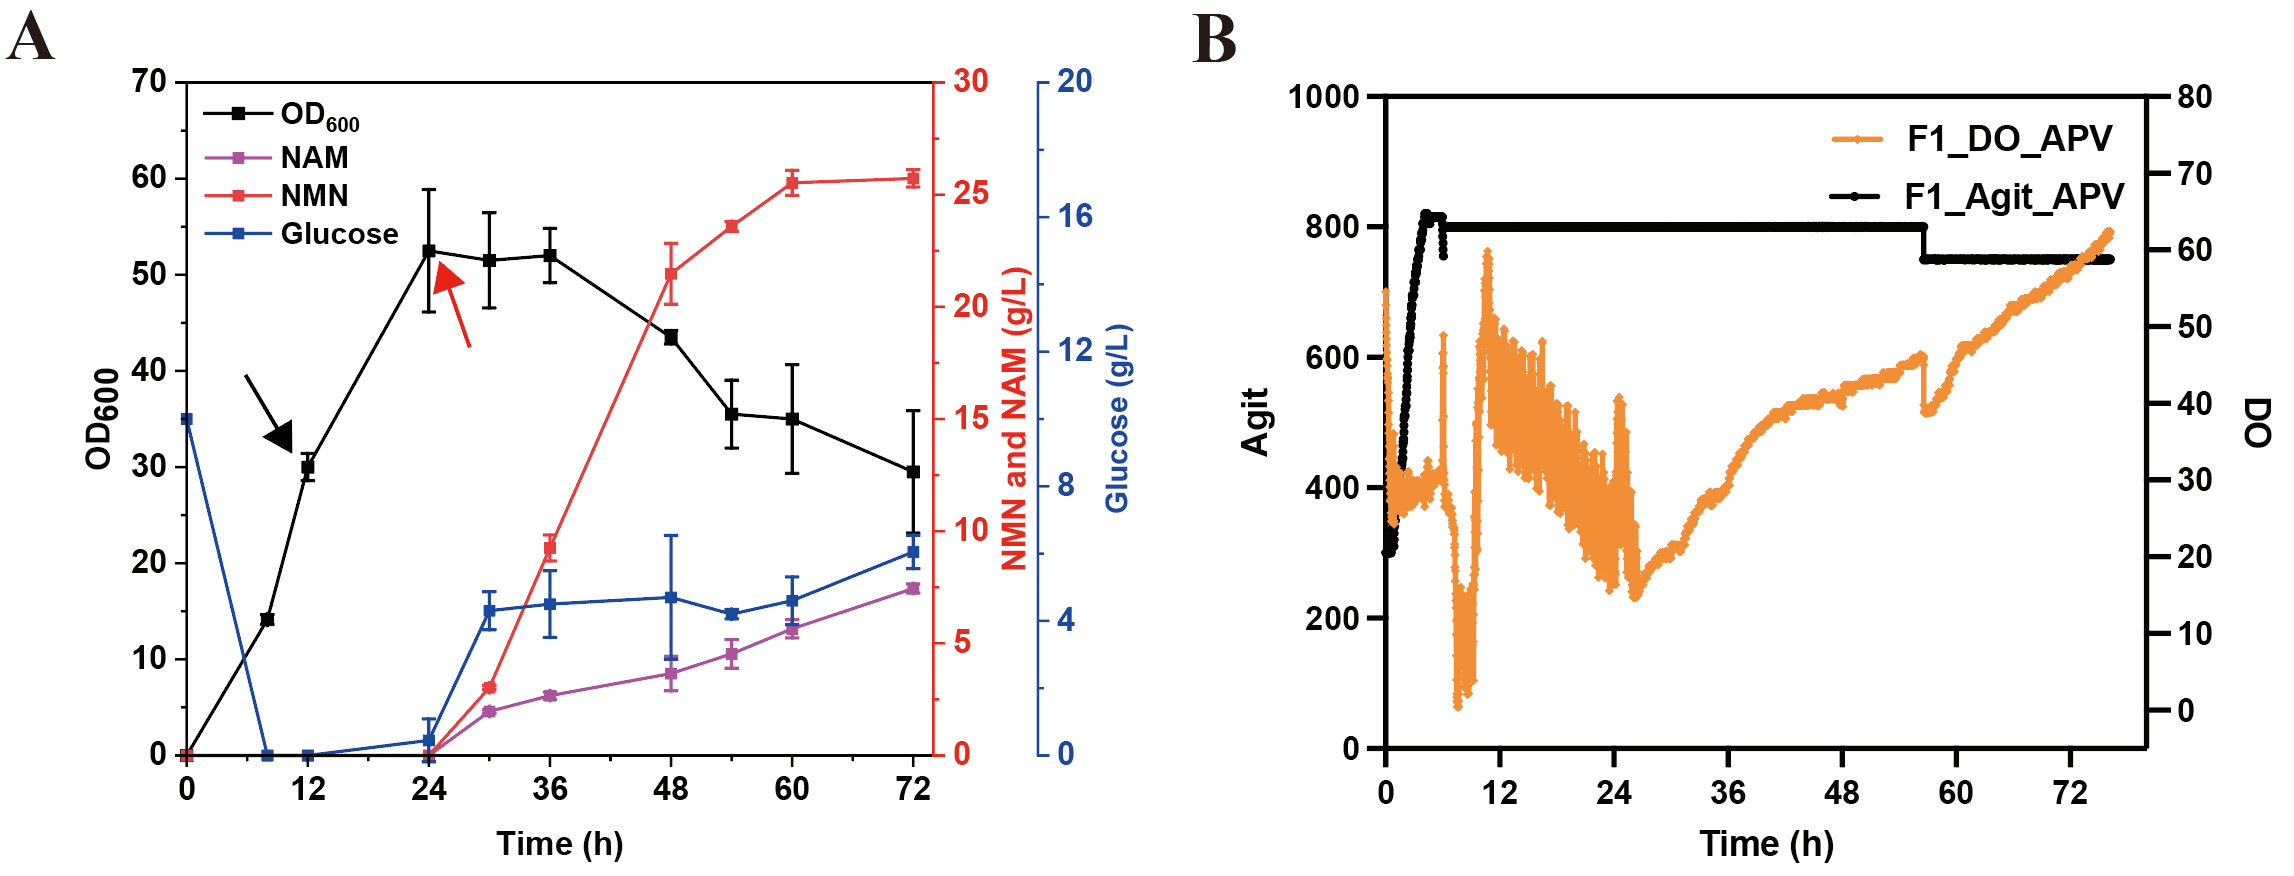


## **Fig S1. Fed-batch production of NMN008 in 2 L bioreactors.** (A) NMN production, residual nicotinamide, cell growth (OD₆₀₀), and consumption of glucose during fermentation. (B) Relationship between dissolved oxygen (DO) and agitation speed. The black arrows represent the addition of arabinose and lactose to induce protein expression. The red arrows represent the start of the conversion.
